1        **Strengthening access to and confidence in COVID-19 vaccines among equity-deserving**  
2                                        **populations across Canada: An exploratory qualitative study**

3  
4 Kainat Bashir<sup>1\*</sup>, Mariame O. Ouedraogo<sup>2\*</sup>, Christoffer Dharma<sup>2</sup>, Mercedes Sobers<sup>2,5</sup>, Vajini  
5 Atukorale<sup>2</sup>, Dane Mauer-Vakil<sup>1,3</sup>, Anushka Ataullahjan<sup>2,4#</sup>, Shaza A. Fadel<sup>2#</sup>, Sara Allin<sup>1, 2#</sup>

6  
7 **Affiliations:**

- 8 1. Institute of Health Policy, Management & Evaluation, University of Toronto, 155 College  
9 Street, Toronto, ON M5T 3M7, Canada  
10 2. Dalla Lana School of Public Health, University of Toronto, 155 College Street, Toronto, ON  
11 M5T 3M7, Canada  
12 3. School of Public Health Sciences, University of Waterloo, 200 University Ave W, Waterloo,  
13 ON N2L 3G5  
14 4. School of Health Studies, Western University, 1151 Richmond Street, London, Ontario,  
15 Canada, N6A 3K7  
16 5. Office of Health Equity, Centre for Addiction and Mental Health, Toronto, Ontario, Canada

17 \*Co-first authorship. These authors contributed equally to this work.

18 #These authors contributed equally as supervisors to the lead authors and as co-senior responsible  
19 authors.

20  
21 **Corresponding author:** Kainat Bashir, [kainat.bashir@mail.utoronto.ca](mailto:kainat.bashir@mail.utoronto.ca)

22 **Declarations:** We declare no conflict of interest.

23 **Word count:** Abstract – 298 words; Main text – 5188 words

24 **ABSTRACT (284 of 300 words)**

25 **Introduction:** There is a need to reflect on the COVID-19 vaccine distribution across Canada  
26 and the extent to which they considered equity-deserving populations. This paper examined and  
27 compared strategies implemented by six Canadian provinces to increase access and promote the  
28 uptake of COVID-19 vaccines among selected priority populations. We also explored the factors  
29 that impacted the implementation of these strategies.

30 **Methods:** In six provinces (Alberta, British Columbia, Manitoba, Nova Scotia, Ontario, and  
31 Quebec), we conducted an environmental scan of provincial rollout documents and media  
32 sources reporting vaccine distribution among selected priority populations: First Nations, Inuit,  
33 and Metis; Black communities; essential workers; people experiencing homelessness; and people  
34 with disabilities. We subsequently interviewed 39 key informants to validate the environmental  
35 scan results, identify additional strategies to increase COVID-19 vaccine uptake, and uncover  
36 perceptions of the facilitators and challenges that influenced the strategies' implementation.

37 **Results:** Through the environmental scans and key informant interviews, we identified that  
38 provincial health authorities employed a panoply of strategies to overcome geographic, financial,  
39 and attitudinal barriers to COVID-19 vaccines experienced by the priority populations. Most  
40 provinces implemented walk-in, mobile, and pop-up vaccination clinics, mobilized public and  
41 private health workforce, and designed multilingual communication materials. Facilitators in  
42 implementing COVID-19 vaccination strategies included fostering inter-governmental  
43 cooperation, harmonizing communication efforts, leveraging existing relationships and networks,  
44 and ensuring representation and leadership of community partners. Challenges to implementing  
45 COVID-19 vaccination strategies included uncoordinated communication efforts, inadequate

46 distribution of vaccines to areas with the greatest need, mistrust in the government and  
47 healthcare system, vaccine hesitancy, and lack of cultural competence by vaccine providers.

48 **Conclusions:** This study highlights the divide between well-intentioned strategies and  
49 interventions and the reality of on-the-ground implementation. The findings offer valuable  
50 insights and can inform the implementation of strategies to distribute vaccines equitably in future  
51 large-scale vaccination efforts in Canada and globally.

52

53 **KEYWORDS**

54 COVID-19 – Vaccine access and uptake – Health equity – Implementation science – Canada

55

56

57

58

59

60

61

62

63

64

65

## 66 **BACKGROUND**

67 The COVID-19 pandemic was a global health emergency of unprecedented nature that resulted  
68 in an estimated 6.9 million deaths globally and 52,000 in Canada between January 2020 and May  
69 2023 (1). The rapid spread of the novel coronavirus prompted all high-resource countries to  
70 institute a myriad of prevention and control measures and invest massively in developing,  
71 procuring, and distributing vaccines (2). With the increased availability of COVID-19 vaccines,  
72 calls for vaccine equity within and among countries emerged (3-8). Vaccine equity in the context  
73 of the COVID-19 pandemic was seen as an imperative to "end this pandemic, restart economies,  
74 and begin to tackle the other great challenges of our time" (4). Based on lessons from the H1N1  
75 pandemic (9, 10), key approaches towards domestic vaccine equity in Canada have been  
76 ensuring adequate vaccine procurement from pharmaceutical companies and guaranteeing  
77 citizens' free access to COVID-19 vaccines.

78  
79 Vaccine equity is highly complex and goes beyond ensuring a sufficient procurement of vaccines  
80 and reducing end-user vaccine costs. It is also shaped by factors such as accessibility to vaccines  
81 and the confidence in their efficacy and the health actors delivering them (2, 5, 6). Vaccine  
82 access and confidence are, in turn, influenced by social and economic conditions like physical  
83 environment, culture, and experiences of discrimination, racism, and historical trauma (6).  
84 Studies from high-income countries have shown that vaccine hesitancy and poor access to  
85 vaccination services are higher among Black, Indigenous, and other minoritized populations than  
86 non-racialized people due to historical and current systemic racism and distrust of the health  
87 system (6-8). In Canada, specifically, an analysis based on the 2020 Canadian Community  
88 Health Survey (CCHS), an ongoing yearly cross-sectional survey conducted by Statistics

89 Canada, found that Canadians who self-identify as off-reserve First Nations, Black, or Arab were  
90 less likely to have received at least one dose of a COVID-19 vaccine (11). Another population-  
91 based survey in Canada also identified that essential non-healthcare workers had lower intention  
92 to receive a COVID-19 vaccine than non-essential workers (12). Evidence from other studies  
93 from high-income countries also points to homelessness and disability influencing the  
94 acceptance of and access to COVID-19 vaccines (13-15).

95  
96 Guided by its Ethics, Equity, Feasibility, and Acceptability (EEFA) framework (16), Canada's  
97 National Advisory Committee on Immunization (NACI), an independent advisory committee of  
98 experts in immunization and other health-related fields, established preliminary guidance for an  
99 equitable distribution of COVID-19 vaccines across the country in the context of limited vaccine  
100 supply (17, 18). It defined priority populations for immunization based on their likelihood of  
101 severe illness and death and transmitting COVID-19 to high-risk individuals, vital employees,  
102 and those in risky environments. In its guidelines, NACI also called for considering pre-existing  
103 social and structural inequities, magnifying the vulnerability of some population groups (18).  
104 The committee suggested using a mix of interventions and strategies to improve vaccine uptake  
105 and confidence in identified priority populations, recognizing that a one-size-fits-all vaccine  
106 response would not be effective (17, 18). The provinces and territories began rolling out COVID-  
107 19 vaccines to their residents soon after the federal government procured the Pfizer-BioNTech  
108 and Moderna vaccines and Health Canada approved their use in December 2020 (19). Provincial  
109 and territorial governments could consider NACI guidelines when designing and implementing  
110 their vaccination eligibility and distribution plans (20).

111

112 Despite establishing equity-centered guidelines and achieving one of the highest vaccination  
113 rates in the world, with close to 80.5% of the population having received at least two doses of  
114 COVID-19 vaccines as of September 2023 (21), Canada still records vaccination rates that vary  
115 significantly by geography, race, ethnicity, and working and living conditions (8). This raises the  
116 question of how equity was integrated into the immunization approaches employed across the  
117 country and how NACI guidelines were translated into practices in provinces. From examples of  
118 vaccination campaigns for the H1N1 pandemic (22) and other major public health concerns like  
119 measles (23, 24) and human papillomavirus infection (24, 25), it is well recognized that  
120 enhancing vaccine access, overcoming vaccine hesitancy, and ultimately achieving vaccine  
121 equity, require strategies and interventions addressing the needs and concerns of various  
122 population groups.

123  
124 In light of the variability in vaccination rates by social and economic conditions, this study aimed  
125 to understand and reflect on the COVID-19 vaccine provincial response in Canada and how it  
126 reached equity-deserving populations. This study sheds some light on this by assessing the  
127 provincial strategies employed to promote and facilitate the uptake of and confidence in the  
128 COVID-19 first and second vaccine doses among key populations identified by NACI and the  
129 factors influencing their implementation. Our findings can support learning about governments'  
130 roles and processes to achieve equitable vaccine access and confidence, particularly in the  
131 context of future emergency and routine mass vaccination efforts in Canada and globally.

132

## 133 **MATERIALS AND METHODS**

134 Based on NACI’s guidelines, populations of interest in this study include First Nations, Métis,  
135 and Inuit (FNIM) populations, Black communities, essential workers, people with disabilities,  
136 and people experiencing homelessness in six pre-selected provinces (i.e., Alberta, British  
137 Columbia, Manitoba, Nova Scotia, Ontario, and Quebec) that make up for approximately 90% of  
138 the Canadian population.

139 Our study consisted of an environmental scan complemented by interviews with key informants  
140 who could speak about provincial rollouts of COVID-19 vaccines. We first gathered publicly  
141 available information about the strategies taken by selected provinces of interest to deliver the  
142 COVID-19 first and second vaccine doses to the populations prioritized by NACI. This was done  
143 by means of conducting an environmental scan of provincial documents and news releases,  
144 scientific literature, and media sources reporting on vaccine prioritization and distribution among  
145 our selected populations. The first environmental scan was completed in June 2021, prior to the  
146 start of the interview phase. Informed by the “Reach” dimension of the RE-AIM framework (26),  
147 we used a content analysis approach to extract data from the documents around the prioritization  
148 of populations and the strategies employed to promote COVID-19 vaccine uptake (Table 1). The  
149 data extracted was used to generate provincial summaries of the rollout of COVID-19 vaccines  
150 for our populations.

151 **Table 1. Questions used to conceptualize the Reach dimension of the RE-AIM framework**

|                                                                                                            |
|------------------------------------------------------------------------------------------------------------|
| 1. Was this population prioritized? If so, when?                                                           |
| 2. Were there clear communication and justification for the choice of this population?                     |
| 3. What strategies or interventions, if any, were used to reach or engage with the prioritized population? |

4. What strategies or interventions, if any, were used to overcome potential challenges to access the vaccine for those populations, including strategies to improve trust and reduce hesitancy?

152

153 We subsequently interviewed individuals from one of the six provinces who either directly  
154 served on COVID-19 vaccine rollout committees, task forces, or advisory panels, or had  
155 extensive knowledge of the rollout of COVID-19 vaccines in the provinces to contextualize,  
156 validate, and supplement findings from the environmental scan. In advance of their interviews,  
157 participants were provided with a summary of the COVID-19 vaccine rollout in their province.  
158 During their interview, respondents were asked questions aligned with those displayed in Table  
159 1, capturing the principles that guided the prioritization of populations for COVID-19  
160 vaccination in their provinces and the strategies used to ensure adequate uptake of vaccines by  
161 the populations of interest in this study. Participants were also asked to reflect on the provincial  
162 strategies and interventions, as well as the factors that influenced the strategies' implementation.  
163 An interpretive descriptive qualitative approach was used to analyze the qualitative interview  
164 data collected (27). The timing of and rationale for prioritizing our selected population groups  
165 during the rollout of COVID-19 vaccines is the focus of another paper conducted by our research  
166 group.

167 Key informants across six selected Canadian provinces (Alberta, British Columbia, Manitoba,  
168 Nova Scotia, Ontario, and Quebec) were invited to participate in the study from November 2021  
169 to April 2022 through email. Potential participants were identified through publicly available  
170 information and the research team's professional networks. An information sheet outlining the  
171 study's objectives and accompanying consent form was shared with the interested informants  
172 prior to the interview. No incentives were offered for participation. In some cases, participants'



173 requests for group interviews (i.e., total of five requests) with their colleagues were  
174 accommodated. Semi-structured interviews were led by two research team members (MS and  
175 VA) and assisted by CD and KB when needed on Zoom and averaged about 1 hour (interview  
176 length ranged from 33 to 85 minutes). Field notes were taken during the interviews. MS and VA  
177 are both doctoral students in the Epidemiology program at the University of Toronto who each  
178 have training in qualitative methods. They both had an awareness of the health systems in the  
179 provinces studied through reading literature and conducting the environmental scan (as described  
180 above). At the end of each interview, participants were asked if they had any suggestions about  
181 who else to interview to gather additional insights on the strategies used to deliver vaccines to  
182 our key populations and their implementation. Interviewees were also invited to provide  
183 additional resources on the strategies not captured in our initial environmental scan. Recruitment  
184 continued until data saturation was reached and no new themes emerged.

185 Interviews were audio recorded on Zoom, and transcripts were auto-generated through Zoom's  
186 Audio transcript feature. A research team member listened to the audio and edited for accuracy  
187 of the transcript. Key informant names and identifying information were removed. Each key  
188 informant was assigned a unique number. Anonymized transcripts were also returned to key  
189 informants to be verified. None of the respondents expressed concerns about the information  
190 they shared. Participants only edited inaudible sections highlighted by the research team.

191 The transcripts were imported into NVivo 12 software. Data were analyzed independently by  
192 research team members (KB, MO, CD, DM) using inductive thematic analysis. We used an  
193 inductive analytic approach as it allowed us to look deeply at the context surrounding the  
194 vaccination strategy and implementation. An inductive approach allowed us to analyze our data

195 without preconceived categories or theories and identify patterns, categories, or themes that may  
196 not have been considered initially (28, 29).

197 Creswell’s approach to coding was followed (30, 31). Each transcript was first read, and key  
198 ideas or responses that addressed the study objectives were highlighted independently by two  
199 research team members. These key ideas or responses were assigned a “code.” Codes were  
200 operationally defined to be consistently applied throughout the data. Similar codes were grouped  
201 to create broader themes, which became our main units of analysis in this study (31). After  
202 coding all the interviews, summaries were developed for each theme by reviewing all data coded.  
203 Two team members (KB and MO) completed this, followed by revision and consensus on the  
204 themes. The team members involved in this process met and compared their interpretations  
205 regularly. All disparities in the coding, categorization, and definitions were discussed, and  
206 consensus was sought throughout.

207 After the key informant interviews, we updated and expanded on the list of strategies gathered  
208 through an update of the earlier scan of published literature on the COVID-19 vaccine rollout in  
209 Canada to account for additional strategies described by key informants as well as other  
210 strategies that we might have missed. The consolidated criteria for reporting qualitative research  
211 (COREQ) were used to guide reporting for this study (32) (Supplementary file). We received  
212 approval from the University of Toronto ethics committee (REB protocol #28098) to conduct the  
213 research in October 2021.

## 214 **RESULTS**

### 215 **Characteristics of the participants**

216 A total of 89 key informants across six Canadian provinces (Alberta, British Columbia,  
217 Manitoba, Nova Scotia, Ontario, and Quebec) were invited to participate in this research study.  
218 We conducted 25 individual and 6 group interviews (based on interviewees' preference) with 41  
219 key informants via Zoom (and, in one case, responses to our interview guide were provided via  
220 email). Two key informants recused their full interview data because of anonymity concerns,  
221 leading to 39 key informants' data being used in the analysis. Most participants were from  
222 Ontario, followed by Nova Scotia and Quebec (Figure 1). A total of 27 key informants (71%)  
223 represented an academic, government, or research institution, while 29% represented a  
224 community organization. Few informants also served on national vaccine advisory boards.  
225 Approximately 90% of participants had experience with communicable disease control and  
226 vaccine delivery programs before the COVID-19 pandemic.

## 227 **Figure 1. Number of key informants interviewed by province**

### 228 **Provincial strategies to improve COVID-19 vaccine uptake by priority populations**

229 Recognizing the need to contain the propagation of COVID-19 cases in the country, provinces  
230 utilized various strategies to promote equitable vaccine uptake among FNIM, Black  
231 communities, essential workers, people experiencing homelessness, and people with disabilities  
232 (Figure 2).

### 233 **Figure 2. Strategies used to deliver COVID-19 first and second doses to priority** 234 **populations**

235 All provinces used the strategy of removing identification requirements to promote equitable  
236 access to COVID-19 vaccines. Health insurance cards were not required to book a COVID-19  
237 vaccine appointment to encourage everyone to access COVID-19 vaccines regardless of their

238 residency status or medical insurance coverage. Additionally, in British Columbia and Ontario,  
239 key informants noted efforts made at the provincial level to remove the requirement for the  
240 Indigenous status card to provide FNIM populations with broader access to COVID-19 vaccines  
241 when they were prioritized before the general public.

242 An array of strategies, including walk-in centres and extended and dedicated vaccination centre  
243 hours were implemented in all six provinces to address the accessibility needs of essential  
244 workers who could find time to get their vaccinations without difficulty. Specific walk-in  
245 vaccination centers were set up for Black communities in some provinces, such as Ontario and  
246 Nova Scotia. In other provinces like Manitoba and British Columbia, some clinic hours were  
247 dedicated to vaccinating the FNIM populations. Like in some other provinces, in Quebec, efforts  
248 were deployed to implement vaccination sites that specifically served people experiencing  
249 homelessness. Furthermore, drive-through, mobile, and pop-up vaccination clinics were  
250 implemented in several provinces to address the needs of those who found it challenging to find  
251 the time or the means to go to the vaccine clinics. As noted by an informant from British  
252 Columbia, different strategies were needed to make the vaccines more accessible:

253 *Knowing that there were various groups that might be hesitant, we just made it as*  
254 *possible as we could, using drop-ins, drive-throughs, or outreach or pop-up clinics, we*  
255 *went out to populations, we made it easy for them to come to us. We organized things if*  
256 *they were concerned (...). We did everything possible to make it safe and accessible for*  
257 *them to feel safe about getting a vaccine.* – Respondent from British Columbia (ID 761)

258 Most provinces also performed adaptations to their vaccination centres to ease the access and  
259 uptake of COVID-19 vaccines by key populations. For example, several respondents indicated

260 that vaccination centres were wheelchair-accessible and low-stimulation areas to serve people  
261 with disabilities better.

262 *(We made) sure that our clinics were disabled-appropriate and friendly, that we had*  
263 *separate channels for people who were physically disabled, and that they had places to*  
264 *sit and be comfortable. We worked with advocacy groups to make sure that they felt*  
265 *their needs were being met, so it was very interactive.* – Respondent from British  
266 Columbia (BC01)

267 In Ontario, there was evidence of efforts made to encourage vaccine access among people  
268 experiencing homelessness by providing meals and a safe place for them to socialize.

269 *We were providing meals. We (wanted to) make sure that we were able to provide a*  
270 *warm, welcoming place and didn't kick them (people experiencing homelessness) out*  
271 *after getting a vaccine, so (we had a) very different clinic style than our normal or*  
272 *generic sort of vaccine clinic* – Respondent from Ontario (ID 373)

273 Another strategy to facilitate vaccine access for essential workers involved collaborating with  
274 private and government-owned enterprises to set up workplace vaccination centres. The strategy  
275 was used in several provinces (Quebec, Alberta, Ontario, and Nova Scotia) to enable workers'  
276 and their families' access to vaccines in convenient and accessible locations that would not  
277 necessitate them to take time off from work. The ability to travel to vaccination sites was  
278 especially challenging for people with disabilities, prompting all provinces to initiate  
279 transportation services for this sub-population. Furthermore, for people experiencing various  
280 disabilities or transportation-related challenges, several provinces organized at-home vaccination

281 efforts. For other key populations, some efforts to offer transportation services were reported in  
282 Manitoba and Nova Scotia.

283 All provinces relied, to varying degrees, on local pharmacies and primary care physicians to  
284 administer the first and second doses of COVID-19 vaccines. Involving pharmacies and primary  
285 care physicians was seen as an effective way to quickly increase equitable access to vaccines  
286 across all population groups, including priority populations. Individuals could get their COVID-  
287 19 vaccine doses in an environment they trusted and were comfortable in. Respondents also  
288 explained that using pharmacies and primary care physicians was seen to be appropriate for  
289 people with mobility or distance-related issues to receive their vaccine at a familiar, convenient,  
290 and accessible place:

291 *Having vaccination in local pharmacies increased accessibility but also the confidence*  
292 *(of the) individuals who went to those pharmacies regularly. They have more of a*  
293 *trusting bond with their pharmacists. (...) It's more personalized and closer to home. -*

294 Respondent from Quebec (ID 509)

295 Strategies were also used by provinces to improve the distribution of the first and second doses  
296 of the COVID-19 vaccines to communities disproportionately hit by the COVID-19 pandemic  
297 and with known low vaccine confidence. One such strategy was the ‘high-priority community  
298 strategy’ utilized by Ontario’s government. The strategy consisted of funding community  
299 organizations to implement appropriate COVID-19 vaccination initiatives in Ontario’s racialized,  
300 low-income, and marginalized communities. The province of British Columbia also adopted a  
301 similar strategy, identifying and prioritizing high-transmission communities for vaccination in  
302 April 2021. Through the ‘high-transmission neighborhood vaccine plan,’ British Columbians

303 born in 1981 or before (40+) living in 13 communities were prioritized for the AstraZeneca  
304 vaccine ahead of the general public.

305 *The High Priority Community Strategy focused on marginalized and racialized*  
306 *populations. We led agencies within those communities that were funded to provide*  
307 *engagement, education, and culturally appropriate support in languages that were*  
308 *particular in those communities. (...) You would see pop-ups at mosques, temples,*  
309 *community centers, and churches. So, very much focused again on particular*  
310 *congregations and community groups. (...) We worked to provide vaccinators who were*  
311 *from those communities, so there was an additional comfort level.* – Respondent from  
312 Ontario (ID 624)

313 Another approach that informants from Ontario described was the ‘ring-fencing’ approach,  
314 which was utilized to allocate a specific number of doses of vaccines for Black populations in the  
315 province, as recommended by the province’s Black Scientists’ Taskforce on Vaccine Equity. The  
316 concept of “ring-fencing” originates in the fields of business or finance and refers to the act of  
317 setting aside a portion of the assets a company owns without necessarily being operated as a  
318 separate entity. In Manitoba, informants referred to the ‘push and pull method” that was applied  
319 in providing vaccines to FNIM populations living on reserves where the supply of vaccines was  
320 controlled based on the community's needs at the time. During the initial stages of the vaccine  
321 rollout, a “push” delivery system was used where FNIM communities received more doses to  
322 address the high demand for vaccines. Due to the unpredictable nature of the delivery system at  
323 that time, a shift to a more routine “pull” vaccine ordering system was made when the need was  
324 met, and high rates were achieved in those communities to ensure that enough doses were  
325 available to be administered equitably. Informants in British Columbia described a collaboration

326 between the province of British Columbia and the First Nations Health Authority to implement a  
327 “whole community approach” to vaccinate First Nations, regardless of whether they lived in  
328 urban areas or on reserve.

329 *(The Whole Community Approach) was quite philosophically different (from how) we*  
330 *looked at the allocation of resources and the rollout. I think what made a huge*  
331 *difference here was looking at and embracing the social determinants of health. And*  
332 *the context by which many (First Nations communities) are living, be it rural, remote,*  
333 *or urban, and the impact on their health and wellness as a result of it (...) We were*  
334 *successful in many regards for advocating for a Whole Community Approach that*  
335 *really honored the lived experience of (the First Nations communities) community. –*

336 Respondent from British Columbia (ID 370)

337 All provinces provided resources related to COVID-19 vaccination in multiple languages to  
338 ensure that all residents were able to understand the public health messaging, and as a result felt  
339 encouraged to book their vaccine appointments. Additionally, provinces supported community-  
340 led and culturally-appropriate vaccination centres. Clinics that were specific to the needs of the  
341 community and staffed with health professionals from the community were set up, allowing  
342 members of the community to feel safe while receiving their COVID-19 vaccine. In some  
343 provinces, translators were offered at vaccination sites. Another example of this was capitalizing  
344 on the existing relationship several provinces had with Friendship Centres to partner in the  
345 delivery of vaccines and address vaccine hesitancy in a safe environment among urban FNIM  
346 populations.

347 Finally, several provinces provided financial and non-financial incentives to increase the uptake  
348 of COVID-19 vaccines in priority populations. For example, essential workers in most provinces



349 were offered paid time off to get vaccines. In Ontario, small cash honorariums, coffee gift cards,  
350 and meals were used as strategies to encourage vaccination among people experiencing  
351 homelessness. Other monetary and non-monetary incentives not specific to communities were  
352 used in other provinces (e.g., gift card program in Alberta and lotteries with cash prizes in  
353 Manitoba and Quebec).

354

### 355 **Facilitators of the implementation of strategies to improve COVID-19 vaccine uptake by** 356 **priority populations**

357 Through our analysis of the key informant interviews, we identified the following factors as  
358 facilitators of the implementation of provincial strategies used to deliver COVID-19 first and  
359 second doses to priority populations: intergovernmental cooperation; harmonized communication  
360 efforts; leveraging existing relationships, networks, and infrastructures; and representation and  
361 leadership of community partners (Figure 3). While there may be some overlap in these  
362 approaches, we will outline distinct examples of each below.

### 363 **Figure 3. Facilitators and challenges to the implementation of provincial strategies used to** 364 **deliver COVID-19 first and second doses to priority populations**

#### 365 ***Inter-governmental cooperation***

366 Several provinces adopted a whole-of-government approach, calling for the cooperation of all  
367 government departments and agencies to foster the operationalization of the COVID-19 vaccine  
368 uptake strategies. Provinces collaborated with government leadership at the local level and with  
369 the federal government, allowing the implementation of their strategies in a more integrated,

370 collaborative, inclusive, and efficient way, thus minimizing gaps in the COVID-19 vaccine  
371 rollout.

372 *I think one of the critical success factors in Manitoba was that kind of collective,*  
373 *cooperative model. All hands-on deck, all jurisdictions working together (...) As much*  
374 *as possible de-politicized and focused on a healthcare response.* – Respondent from  
375 Manitoba (ID 632)

### 376 *Harmonized communication efforts*

377 Some participants expressed that their provincial vaccine communication tools and resources  
378 were clear, straightforward, uniform across jurisdictions, constantly updated, and delivered by  
379 trusted public health experts, contributing to raising the confidence and building the trust of  
380 communities in the provinces' COVID-19 vaccine rollout. Communication materials were  
381 shared with all health authorities as well as media outlets to ensure coordination and  
382 harmonization in the messaging regarding COVID-19 vaccines, which ultimately promoted the  
383 uptake of COVID-19 vaccines in several communities.

### 384 *Leveraging existing relationships, networks, and infrastructures*

385 Leveraging existing relationships, networks, and infrastructures across organizations was a  
386 significant determinant that drove the various strategies employed by the provinces to improve  
387 vaccine uptake among key populations. An example of this was the pre-existing relationship  
388 between the provincial government of Alberta, the Metis Nation of Alberta, and the Metis  
389 General Council of Alberta. According to a key informant in Alberta (ID 672), they could ***“build***  
390 ***on past relationships, past infrastructure, and leveraging them.*”** These pre-existing  
391 partnerships provided a baseline of trust and credibility with the Metis communities of Alberta,  
392 which helped with rolling out the vaccines. They also allowed for the delivery of vaccines in safe

393 environments for Metis and other Indigenous Peoples in the province. Other examples include  
394 provinces capitalizing on their connections with disability-focused advocacy groups and shelter  
395 networks serving people experiencing homelessness to identify the best ways to deliver vaccines  
396 effectively.

### 397 ***Representation and leadership of community partners***

398 Representation and meaningful engagement of community- and faith-based organizations in the  
399 decision-making process were cited as important facilitators of implementing COVID-19 vaccine  
400 uptake strategies in all provinces. As expressed by many respondents, by ensuring the  
401 representation and leadership of community organizations at all stages, provincial health  
402 authorities were able to get diverse perspectives on the COVID-related needs of communities,  
403 identify the most suitable mechanisms and approaches to reach individuals with COVID-19  
404 vaccines and address quickly issues arising during the rollout. Some respondents also indicated  
405 that the use of language- and community-appropriate communication tools was facilitated by the  
406 meaningful involvement of the community in designing those tools.

407 ***One of the things that, I think, was done well was to bring a First Nations health expert***  
408 ***and a BIPOC health expert to represent the decisions that were made and to give them***  
409 ***power [...] to make decisions for their own people. I don't see how we would have had***  
410 ***anything close to as much success without handing the real power of decision-making***  
411 ***to those individuals.*** – Respondent from Manitoba (ID 698)

412 Respondents acknowledged that colonial history, vaccine hesitancy, and mistrust were barriers to  
413 accepting COVID-19 vaccines in some communities. Accordingly, provincial health authorities  
414 worked with community organizations to overcome these issues and ensure adequate and  
415 equitable distribution and uptake of first and second doses of COVID-19 vaccines.

416 *Because of the community knowledge we had around the table, we could identify*  
417 *friendly, familiar locations across the province where we were advised that African*  
418 *Nova Scotians were already familiar with or would use. So those may be churches.*  
419 *Sometimes, they were community recreation centers or some other community center.*  
420 *This was all through a lens of acknowledging vaccine mistrust. So, our partners in the*  
421 *African Nova Scotian community really were educational for us with respect to vaccine*  
422 *hesitancy. This is rooted in mistrust. So, we acknowledged and tried to respond. –*  
423 Respondent from Nova Scotia (ID 765)

424 Through funding structures for community-based organizations, some provinces were able to  
425 provide flexible funding to community organizations, which also played a major role in  
426 facilitating the distribution of vaccines. It allowed for leadership within communities to exercise  
427 more agency over the distribution of vaccines. According to one key informant in Ontario (ID  
428 811), it was important that the government was able to identify the appropriate leadership,  
429 provide them with funding, and then step away as *"government will never be able to move at*  
430 *the pace that (community organizations) do."*

431  
432 **Challenges to the implementation of strategies to improve COVID-19 vaccine uptake by**  
433 **priority populations**

434 Across the six provinces, key informants described several challenges to the implementation of  
435 provincial strategies used to deliver COVID-19 first and second doses to priority populations:  
436 uncoordinated communication efforts; inadequate distribution of vaccines to areas with the  
437 greatest need; mistrust against government and healthcare and vaccine hesitancy; and lack of

438 cultural competency and institutional racism (Figure 3). While there may be some overlap in  
439 these factors, we will outline examples of each below.

#### 440 *Uncoordinated communication efforts*

441 While positive aspects were reported on the communication front, some respondents expressed  
442 that the lack of clear communication often obstructed the rollout of COVID-19 vaccines to  
443 specific communities. For example, health insurance cards were often requested in vaccination  
444 centres, although they were not required in any province. Another example reported by some  
445 informants was regarding the eligibility of FNIM populations in British Columbia for the  
446 vaccines not being communicated across the health authorities, resulting in delays in delivering  
447 vaccines to FNIM Peoples.

448 *Some (vaccine administrators) didn't understand that if somebody showed up and they*  
449 *were younger than the age group (being prioritized at the time), it was okay if they were*  
450 *First Nations (or) Metis. (...) They were not supposed to (ask for ID). There was some*  
451 *confusion, and people didn't know how to address that issue – Respondent from British*  
452 *Columbia (ID 344)*

453 Respondents also noted barriers to quickly getting the provincial multilingual and community-  
454 specific vaccine communication out. Individuals faced delays in knowing their eligibility for the  
455 vaccines and the closest locations where they could get them.

456 *There were challenges (in communication). We heard people say, 'Oh, I didn't even*  
457 *know I was eligible' or 'Oh, I didn't even know (the vaccine) was given there,' even*  
458 *after people had been eligible for vaccination for weeks. So, there were these barriers,*  
459 *and those doing door-to-door and those in touch with communities who (made the*

460 *difference and) reached those not necessarily (part of) the majority watching the press*  
461 *conferences.* – Respondent from Quebec (ID 892)

462 ***Inadequate distribution of vaccines to areas with the greatest need***

463 The initial sub-optimal distribution of vaccines to areas with the greatest need was also identified  
464 as a barrier to implementing COVID-19 vaccine rollout strategies. Some participants alluded to  
465 the initial selection of pharmacies preventing the delivery of vaccines to the most-impacted  
466 communities.

467 *I remember going to the map (to) see where [the pharmacies offering COVID-19*  
468 *vaccines were]. It was interesting. They picked two pharmacies across the street from*  
469 *each other; why didn't they pick (pharmacies in) the hardest-hit areas of Toronto? (...)*  
470 *It's not always easy to get the pharmacies in the areas that you want. You have to ask;*  
471 *some (pharmacies) say yes, and some say no. Pharmacies aren't all built from the same*  
472 *cloth and don't all have the same interest in doing all of this."* – Respondent from  
473 Ontario (ID 436)

474 ***Mistrust in government and healthcare and vaccine hesitancy***

475 As described by several respondents, people experiencing homelessness often expressed mistrust  
476 toward government-led initiatives, which impacted the delivery of vaccines to this population.  
477 This was also noted to be an important barrier when it came to the FNIM and Black populations,  
478 as they have historically been discriminated against and marginalized by the healthcare system.  
479 Furthermore, vaccine hesitancy was described as an intricate issue rooted in a lack of trust in the  
480 public health system and government authorities.

481 *We made sure (to connect) with friendship centers, which is where a lot of folks*  
482 *experiencing homelessness will go, and made sure that we were sharing any of our*  
483 *communications and any of kind of like our vaccine opportunities with those*  
484 *places...But honestly, I don't know what the uptake of that was. Because (...) homeless*  
485 *folks (...) they have certain people they're okay working with. But they're not*  
486 *necessarily trusting folks that just swoop in. And so, there's a lot of those trust issues*  
487 *with that community that are hard to unpack.” – Respondent from Alberta (ID 770)*

#### 488 *Lack of cultural competency and institutional racism*

489 Some participants also indicated how systematic racism reinforced specific groups’ hesitancy  
490 toward the COVID-19 vaccines and resulted in an inadequate uptake of COVID-19 strategies  
491 such as walk-in and pop-up clinics. Moreover, the lack of consideration for cultural safety in  
492 vaccination strategies was perceived as an important barrier to the success of COVID-19  
493 vaccination strategies.

494 *For the large majority of First Nations, Inuit, and Métis People who live in cities,*  
495 *having hospitals implement the vaccines to start with was the worst possible choice for*  
496 *Indigenous Peoples because they don't feel safe in hospitals. We anticipate that they*  
497 *may experience life-threatening racism in hospitals. And we saw that. We saw people*  
498 *getting pulled out of lines. – Respondent from Ontario (ID 767)*

499

## 500 **DISCUSSION**

501 This study examined the strategies used by the provincial authorities of six Canadian  
502 jurisdictions to expand COVID-19 vaccination uptake and confidence in populations

503 recommended for vaccine prioritization by NACI (i.e., FNIM, Black communities, essential  
504 workers, people experiencing homelessness, and people with disabilities). While research into  
505 COVID-19 vaccine equity in Canada has gained great momentum (3, 33, 34), the scientific  
506 literature documenting the strategies and interventions for equity in COVID-19 vaccination and  
507 the factors influencing their implementation remains scarce, as indicated in a recent scoping  
508 review (35). Our work, therefore, makes an important contribution to this knowledge gap.  
509 Examining this topic through the lens of implementation methodologies and frameworks enabled  
510 us to render rich findings and emerging lessons that can guide future governmental efforts to  
511 design and implement vaccine rollout strategies that effectively improve vaccine uptake and  
512 confidence of diverse equity-deserving populations.

513

514 As the supply and availability of COVID-19 vaccines improved in March 2021, provinces  
515 demonstrated ingenuity, agility, and innovation in the strategies employed to improve COVID-  
516 19 vaccine uptake equitably. Similar to a past study that focused on provincial and territorial  
517 preventive and control measures against the spread of COVID-19 (19), we have found nuances  
518 and variability in the vaccine strategies employed by provinces. This was expected, as Canada is  
519 a decentralized federation, where provinces hold the responsibility of designing and delivering  
520 health services, including immunization services, to their populations (19, 20). Studies have  
521 reported that a decentralized vaccination approach has put provinces in a position where they  
522 could "innovate and mobilize quickly" (36) and reach high vaccination rates (33). Our findings  
523 also point to the fact that decentralization encouraged the incorporation of equity into  
524 vaccination efforts. However, we also found that vaccine equity was not consistently prioritized  
525 in the provinces. Existing literature also noted unintended consequences of decentralization, such



526 as Canadian provinces considering equity to varying extents in their vaccination rollout plans  
527 and having limited opportunities for cross-province learning (37, 38).

528  
529 The findings outline a panoply of strategies used by the six jurisdictions, ranging from removing  
530 health card requirements to delivering home vaccination appointments to people with disabilities  
531 and offering monetary and non-monetary incentives to people experiencing homelessness. We  
532 also found that combinations of strategies were used to address simultaneously vaccine access  
533 and vaccine hesitancy. For instance, some provinces like Manitoba and Nova Scotia coordinated  
534 transportation to culturally safe and community-specific vaccination clinics for Black and FNIM  
535 Peoples. Other provinces like Quebec offered workplace vaccination for essential workers and  
536 designed multilingual communication materials. For the success of vaccination efforts,  
537 combining interventions enhancing access to immunization services while building the public's  
538 trust has also been discussed in other studies targeting Black populations (39) and other  
539 marginalized groups (40, 41).

540  
541 Through key informant interviews with individuals involved in leading or advising the vaccine  
542 rollout, we uncovered several important facilitators and challenges to implementing COVID-19  
543 vaccination strategies in Canada. Numerous success stories shared by the key informants  
544 centered on communicating the vaccine strategies used by each provincial authority. Many  
545 interviewees saw the provincial vaccine communication approach as transparent and clear, which  
546 positively influenced the public's trust in the vaccination strategies. However, other respondents  
547 indicated how uncoordinated communication affected vaccine access to minority groups. A study  
548 in Ontario also reported delays in communicating essential information to frontline vaccine

549 providers, which fueled confusion and misunderstanding and disrupted vaccination efforts for  
550 diverse communities (42).

551  
552 Our findings also align with previous research emphasizing the importance of working with  
553 priority groups to deliver COVID-19 vaccine strategies effectively (43). Partnerships between  
554 the government and community-based organizations enabled provincial authorities to recognize  
555 and address pre-existing social, economic, and structural barriers various communities face  
556 during vaccination implementation. By allocating flexible funding to community-based  
557 organizations, provinces also provided opportunities to implement culturally adapted vaccination  
558 services. Still, as raised by many interviewees, community involvement could have been  
559 strengthened throughout the rollout of COVID-19 vaccines to overcome barriers, such as the lack  
560 of cultural safety, vaccine hesitancy, and mistrust in public health authorities. Other published  
561 studies have reported similar conclusions suggesting that provinces engage communities tardily  
562 and unevenly, exacerbating vaccine barriers for equity-deserving communities (13, 33, 37).

563  
564 We also found that leveraging existing infrastructures was an important positive influence in  
565 implementing vaccine strategies. For instance, the use of existing shelters and points of gathering  
566 maximized vaccine access among people experiencing homelessness. Similar findings were  
567 observed by enabling essential workers to get vaccinated in their place of work. These results  
568 also align with published articles (14, 44). Still, our study also identified that the inadequate  
569 distribution of infrastructure across neighborhoods requires explicit attention to guarantee fair  
570 vaccine distribution more generally.

571

572 **Strengths and limitations**

573 Through this study, we were able to gather a wide variety of perspectives on the provincial  
574 strategies to promote equitable vaccine access and uptake of COVID-19 vaccines to equity-  
575 deserving populations of Canada. Our work sheds light on a topic that has received little  
576 attention despite the importance of appraising sub-national variability in approaches and  
577 determinants for equitable mass emergency and routine vaccination efforts in the future.

578  
579 Still, we acknowledge certain limitations. First, we limited our study to six provinces, meaning  
580 we missed important insights from the excluded provinces and territories. However, our team  
581 tried to capture diverse provinces in terms of geography, at-risk populations, and language. In the  
582 early planning stages of the study, we also identified variability in the vaccine prioritization of  
583 selected key populations among the six provinces (45). A second limitation to note is that we  
584 only interviewed a few key informants per province (i.e., between 4 – 10 informants per  
585 province); therefore, the perspectives gathered do not represent an entire province.

586  
587 It is important to mention that although our use of qualitative interviews with key informants and  
588 environmental scans aimed to thoroughly identify all the strategies and interventions deployed by  
589 the six provinces, we may have missed those not publicly available online or mentioned by our  
590 key informants. Still, we tried to mitigate this limitation by regularly updating our environmental  
591 scans throughout this study. This study also does not capture the community-based initiatives  
592 known to have filled the gaps in provincial efforts (46). We were also unable to explore the  
593 degree to which similar strategies were implemented across the six provinces and how they  
594 impacted vaccine acceptance and uptake in priority populations.

595  
596 Additionally, it would have been important to co-develop this research with community-level  
597 members of the priority groups or organizations partnering with government and public officials  
598 to reach priority populations. While key informants interviewed shared their reflections and  
599 opinions on the effectiveness and appropriateness of the strategies identified, it is important to  
600 note that their personal experiences and viewpoints do not necessarily reflect those of members  
601 of the priority populations. Assessing whether the strategies adequately addressed our priority  
602 populations' needs was beyond this project's scope. Still, some research has already emerged on  
603 the fact that strategies, despite best intentions, are needed to respond more adequately to the  
604 needs of specific communities (13).

605  
606 Future research should expand this study's findings by measuring other domains of the RE-AIM  
607 framework (i.e., effectiveness, adoption, and implementation) as well as other key  
608 implementation outcomes, such as the acceptability of the various strategies in responding to the  
609 needs of diverse priority groups. This study was conducted in the early stages of the vaccine  
610 rollout when the context was too dynamic, and the availability of secondary data was too limited  
611 to assess the other dimensions of the RE-AIM framework. The involvement of priority  
612 populations in co-developing and co-interpreting future research endeavors will be important.

613  
614 **CONCLUSIONS**

615 Promoting equitable distribution of vaccines is crucial in minimizing adverse health effects and  
616 attaining widespread immunity. Our findings contribute to the growing literature on approaches  
617 for equitable, efficient, and effective vaccine distribution in Canada and beyond. Understanding

618 the facilitators of and challenges to implementing vaccine rollout strategies will also better guide  
619 government actors in their implementation, funding, and partnership efforts to improve vaccine  
620 uptake and confidence for high-risk and equity-deserving communities moving forward. We  
621 recommend that government actors and policymakers pay closer attention not only to the  
622 structural barriers to vaccines faced by diverse communities but also to the importance of greater  
623 representation and engagement of communities and clear and consistent communication during  
624 the deployment of vaccine rollout strategies. Accounting for these recommendations will help  
625 promote equitable vaccine distribution in forthcoming large-scale emergency or routine  
626 vaccination programs within Canada and globally.

627

## 628 **ACKNOWLEDGMENTS**

629 The study team acknowledges the interviewees for their time and participation during this study.  
630 We also acknowledge the students and professors in the Implementation Science Trainee Cluster  
631 at the Dalla Lana School of Public Health, University of Toronto, whose perspectives helped  
632 shape this work.

## 633 REFERENCES

- 634 1. Organization WH. WHO Coronavirus (COVID-19) Dashboard 2023 [Available from:  
635 <https://covid19.who.int>.
- 636 2. Dubé E, Gagnon D, MacDonald N. Between persuasion and compulsion: The case of  
637 COVID-19 vaccination in Canada. *Vaccine*. 2022;40(29):3923-6.
- 638 3. Guay M, Maquiling A, Chen R, Lavergne V, Baysac D-J, Racine A, et al. Measuring  
639 inequalities in COVID-19 vaccination uptake and intent: results from the Canadian Community  
640 Health Survey 2021. *BMC Public Health*. 2022;22(1):1-16.
- 641 4. Organization WH. Vaccine Equity Declaration [Available from:  
642 <https://www.who.int/campaigns/vaccine-equity/vaccine-equity-declaration>.
- 643 5. Doornekamp L, van Leeuwen L, van Gorp E, Voeten H, Goeijenbier M. Determinants of  
644 vaccination uptake in risk populations: a comprehensive literature review. *Vaccines (Basel)*.  
645 2020;8(3):480.
- 646 6. Aw J, Seng JJB, Seah SSY, Low LL. COVID-19 Vaccine Hesitancy-A Scoping Review  
647 of Literature in High-Income Countries. *Vaccines (Basel)*. 2021;9(8).
- 648 7. Nascimento LG, Dubé È, Burns KE, Brown P, Calnan M, Ward PR, et al. Informing  
649 efforts beyond tailored promotional campaigns by understanding contextual factors shaping  
650 vaccine hesitancy among equity-deserving populations in Canada: an exploratory qualitative  
651 study. *International Journal for Equity in Health*. 2023;22(1):209.
- 652 8. Cénat JM, Noorishad P-G, Moshirian Farahi SMM, Darius WP, Mesbahi El Aouame A,  
653 Onesi O, et al. Prevalence and factors related to COVID-19 vaccine hesitancy and unwillingness  
654 in Canada: A systematic review and meta-analysis. *J Med Virol*. 2023;95(1):e28156.
- 655 9. Fidler DP. Negotiating equitable access to influenza vaccines: global health diplomacy  
656 and the controversies surrounding avian influenza H5N1 and pandemic influenza H1N1. *PLoS*  
657 *medicine*. 2010;7(5):e1000247.
- 658 10. Hébert PC, MacDonald N. The H1N1 vaccine race: Can we beat the pandemic? : *Can*  
659 *Med Assoc*; 2009. p. E125-E.
- 660 11. Government of Canada SC. COVID-19 vaccine willingness among Canadian population  
661 groups. 2021.
- 662 12. Ogilvie GS, Gordon S, Smith LW, Albert A, Racey CS, Booth A, et al. Intention to  
663 receive a COVID-19 vaccine: results from a population-based survey in Canada. *BMC Public*  
664 *Health*. 2021;21(1):1017.
- 665 13. Sebring JCH, Capurro G, Kelly C, Jardine CG, Tustin J, Driedger SM. "None of it was  
666 especially easy": improving COVID-19 vaccine equity for people with disabilities. *Can J Public*  
667 *Health*. 2022;113(6):887-97.
- 668 14. Ahillan T, Emmerson M, Swift B, Golamgouse H, Song K, Roxas A, et al. COVID-19 in  
669 the homeless population: a scoping review and meta-analysis examining differences in  
670 prevalence, presentation, vaccine hesitancy and government response in the first year of the  
671 pandemic. *BMC Infectious Diseases*. 2023;23(1):155.
- 672 15. Shariff SZ, Richard L, Hwang SW, Kwong JC, Forchuk C, Dosani N, et al. COVID-19  
673 vaccine coverage and factors associated with vaccine uptake among 23 247 adults with a recent  
674 history of homelessness in Ontario, Canada: a population-based cohort study. *The Lancet Public*  
675 *Health*. 2022;7(4):e366-e77.

- 676 16. Ismail SJ, Hardy K, Tunis MC, Young K, Sicard N, Quach C. A framework for the  
677 systematic consideration of ethics, equity, feasibility, and acceptability in vaccine program  
678 recommendations. *Vaccine*. 2020;38(36):5861-76.
- 679 17. Canada PHAo. Archived: Preliminary guidance on key populations for early COVID-19  
680 immunization [2020-11-03]. 2020.
- 681 18. Ismail SJ, Zhao L, Tunis MC, Deeks SL, Quach C. Key populations for early COVID-19  
682 immunization: preliminary guidance for policy. *CMAJ*. 2020;192(48):E1620-E32.
- 683 19. Cameron-Blake E, Breton C, Sim P, Tatlow H, Hale T, Wood A, et al. Variation in the  
684 Canadian provincial and territorial responses to COVID-19. Blavatnik School of Government;  
685 2021/03/08/.
- 686 20. Government of Canada OotAGoC. Report 9—COVID-19 Vaccines. 2022.
- 687 21. Canada PHAo. Demographics: COVID-19 vaccination coverage in Canada - Canada.ca.  
688 aem. 2021.
- 689 22. Mosby I, Swidrovich J. Medical experimentation and the roots of COVID-19 vaccine  
690 hesitancy among Indigenous Peoples in Canada. *CMAJ*. 2021;193(11):E381-E3.
- 691 23. Cutts FT, Ferrari MJ, Krause LK, Tatem AJ, Mosser JF. Vaccination strategies for  
692 measles control and elimination: time to strengthen local initiatives. *BMC Med*. 2021;19(1):2.
- 693 24. Hardt K, Bonanni P, King S, Santos JI, El-Hodhod M, Zimet GD, et al. Vaccine  
694 strategies: Optimising outcomes. *Vaccine*. 2016;34(52):6691-9.
- 695 25. Zhang X, Tang L. Cultural adaptation in HPV vaccine intervention among racial and  
696 ethical minority population: a systematic literature review. *Health Education Research*.  
697 2021;36(5):479-93.
- 698 26. Glasgow RE, Vogt TM, Boles SM. Evaluating the public health impact of health  
699 promotion interventions: the RE-AIM framework. *American journal of public health*.  
700 1999;89(9):1322-7.
- 701 27. Thorne S. Interpretive description: Qualitative research for applied practice: Routledge;  
702 2016.
- 703 28. Thomas DR. A general inductive approach for analyzing qualitative evaluation data.  
704 *American journal of evaluation*. 2006;27(2):237-46.
- 705 29. Azungah T. Qualitative research: deductive and inductive approaches to data analysis.  
706 *Qualitative research journal*. 2018;18(4):383-400.
- 707 30. Charrier L, Garlasco J, Thomas R, Gardois P, Bo M, Zotti CM. An Overview of  
708 Strategies to Improve Vaccination Compliance before and during the COVID-19 Pandemic. *Int J*  
709 *Environ Res Public Health*. 2022;19(17).
- 710 31. Creswell JW. Educational research: pearson; 2012.
- 711 32. Tong A, Sainsbury P, Craig J. Consolidated criteria for reporting qualitative research  
712 (COREQ): a 32-item checklist for interviews and focus groups. *International journal for quality*  
713 *in health care*. 2007;19(6):349-57.
- 714 33. Kholina K, Harmon SHE, Graham JE. An equitable vaccine delivery system: Lessons  
715 from the COVID-19 vaccine rollout in Canada. *PLoS ONE*. 2022;17(12):e0279929.
- 716 34. Eissa A, Lofters A, Akor N, Prescod C, Nnorom O. Increasing SARS-CoV-2 vaccination  
717 rates among Black people in Canada. *CMAJ*. 2021;193(31):E1220-E1.
- 718 35. Aggarwal M, Kokorelias KM, Glazier RH, Katz A, Shiers-Hanley JE, Upshur RE. What  
719 is the role of primary care in the COVID-19 vaccine roll-out and the barriers and facilitators to  
720 an equitable vaccine roll-out? A rapid scoping review of nine jurisdictions. *BMJ open*.  
721 2023;13(4):e065306.



- 722 36. Cyr A, Mondal P, Hansen G. An inconsistent Canadian provincial and territorial response  
723 during the early COVID-19 pandemic. *Front Public Health*. 2021;9:708903.
- 724 37. Kapiriri L, Essue BM, Velez CM, Julia A, Elysee N, Bernardo A, et al. Was priority  
725 setting included in the Canadian COVID-19 pandemic planning and preparedness? A  
726 comparative analysis of COVID-19 pandemic plans from eight provinces and three territories.  
727 *Health Policy*. 2023;133:104817.
- 728 38. Fitzpatrick T, Camillo C, Hillis S, Habbick M, Mauer-Vakil D, Roerig M, et al.  
729 Comparison of COVID-19 vaccination rollout approaches across Canada: Case studies of four  
730 diverse provinces. 2023.
- 731 39. Dada D, Djiometio JN, McFadden SM, Demeke J, Vlahov D, Wilton L, et al. Strategies  
732 That Promote Equity in COVID-19 Vaccine Uptake for Black Communities: a Review. *J Urban*  
733 *Health*. 2022;99(1):15-27.
- 734 40. Demeke J, McFadden SM, Dada D, Djiometio JN, Vlahov D, Wilton L, et al. Strategies  
735 that Promote Equity in COVID-19 Vaccine Uptake for Undocumented Immigrants: A Review. *J*  
736 *Community Health*. 2022;47(3):554-62.
- 737 41. *Frontiers | Strategies to Address COVID-19 Vaccine Hesitancy and Mitigate Health*  
738 *Disparities in Minority Populations*.
- 739 42. Vernon-Wilson E, Tetui M, Nanyonjo A, Adil M, Bala A, Nelson D, et al. Unintended  
740 consequences of communicating rapid COVID-19 vaccine policy changes- a qualitative study of  
741 health policy communication in Ontario, Canada. *BMC Public Health*. 2023;23(1):932.
- 742 43. Nascimento LG, Dubé È, Burns KE, Brown P, Calnan M, Ward PR, et al. Informing  
743 efforts beyond tailored promotional campaigns by understanding contextual factors shaping  
744 vaccine hesitancy among equity-deserving populations in Canada: an exploratory qualitative  
745 study. *International Journal for Equity in Health*. 2023;22(1):209.
- 746 44. Fabreau GE, Holdbrook L, Peters CE, Ronksley PE, Attaran A, McBrien K, et al.  
747 Vaccines alone will not prevent COVID-19 outbreaks among migrant workers—the example of  
748 meat processing plants. *Clinical Microbiology and Infection*. 2022;28(6):773-8.
- 749 45. Mauer-Vakil D, Dharma C, Sobers M, Bashir K, Atukorale V, Ouedraogo M. Lessons  
750 Learned Conducting Implementation Science Research on the COVID-19 Vaccination Rollout  
751 During a Global Pandemic. *Healthy Populations Journal*. 2023;3(4).
- 752 46. Benoit C, Bourgeault I, Mykhalovskiy E. How equitable has the COVID-19 response  
753 been in Canada? *Can J Public Health*. 2022;113(6):791-4.
- 754



1 **Figure 1. Number of key informants interviewed by province**

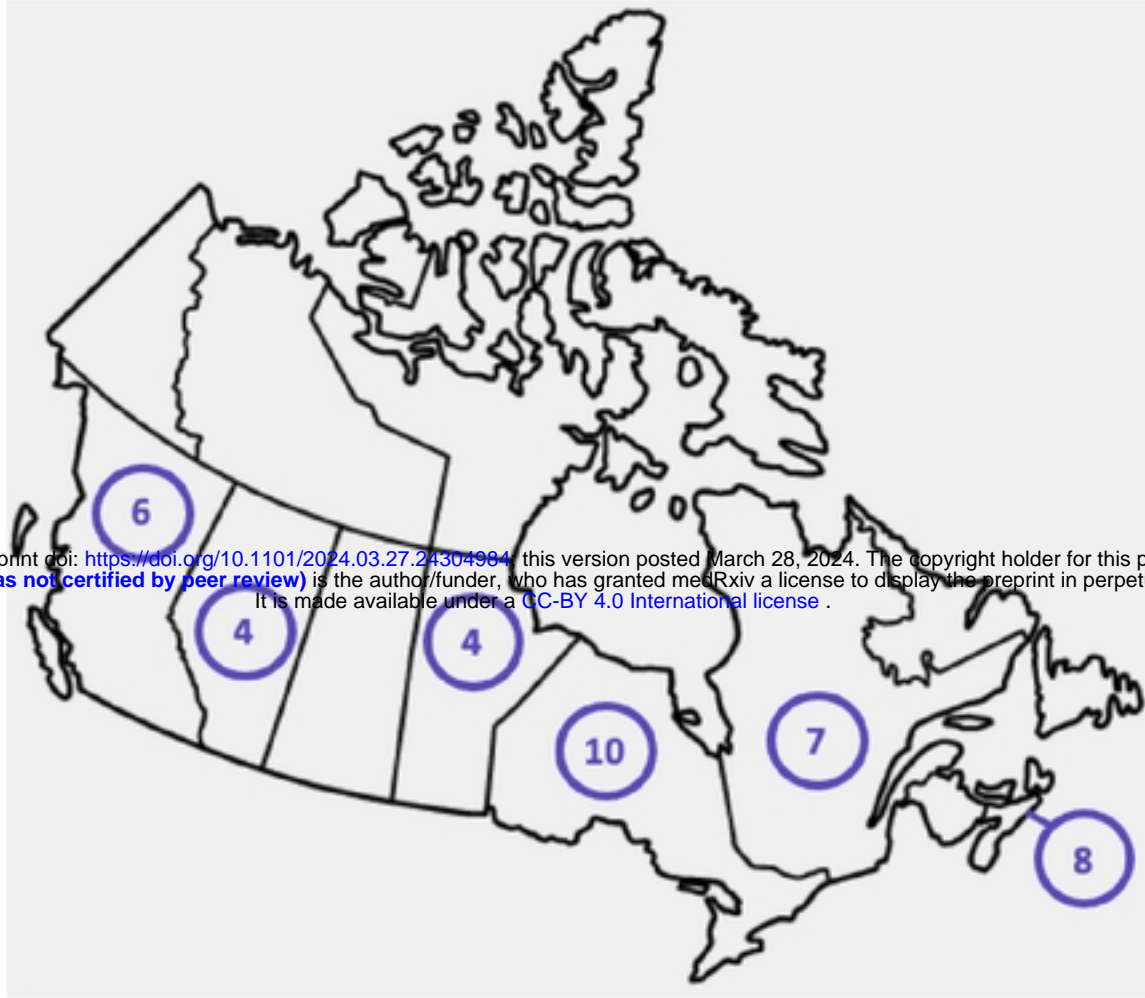

medRxiv preprint doi: <https://doi.org/10.1101/2024.03.27.24304984>; this version posted March 28, 2024. The copyright holder for this preprint (which was not certified by peer review) is the author/funder, who has granted medRxiv a license to display the preprint in perpetuity. It is made available under a [CC-BY 4.0 International license](https://creativecommons.org/licenses/by/4.0/).

3 **Figure 2. Strategies used to deliver COVID-19 first and second doses to priority populations**

| Strategies/Study Population                                                        | Black population |    |    |    |    |    | Essential workers |    |    |    |    |    | Individuals experiencing homelessness |    |    |    |    |    | Indigenous population |    |    |    |    |    | Individuals with disabilities |    |    |    |    |    |
|------------------------------------------------------------------------------------|------------------|----|----|----|----|----|-------------------|----|----|----|----|----|---------------------------------------|----|----|----|----|----|-----------------------|----|----|----|----|----|-------------------------------|----|----|----|----|----|
|                                                                                    | AB               | BC | MB | NS | ON | QC | AB                | BC | MB | NS | ON | QC | AB                                    | BC | MB | NS | ON | QC | AB                    | BC | MB | NS | ON | QC | AB                            | BC | MB | NS | ON | QC |
| Inter-governmental cooperation                                                     |                  |    | ■  |    |    |    |                   |    | ■  |    | ■  |    |                                       |    | ■  |    | ■  |    |                       |    | ■  |    |    |    |                               |    | ■  |    |    |    |
| Removal of identification requirements                                             |                  |    |    |    |    |    |                   |    |    |    |    | ■  |                                       |    |    |    |    | ■  |                       | ■  |    |    |    | ■  |                               |    |    |    |    |    |
| Walk-in clinics, extended vaccination clinic hours, and dedicated clinic hours     | ■                | ■  | ■  | ■  |    | ■  | ■                 | ■  | ■  | ■  | ■  | ■  | ■                                     | ■  | ■  |    |    |    | ■                     | ■  | ■  |    |    |    | ■                             | ■  | ■  |    |    | ■  |
| Physical adaptations to vaccination centers                                        |                  |    |    |    |    |    |                   |    |    |    |    |    |                                       |    |    |    | ■  |    |                       |    |    |    |    |    | ■                             | ■  | ■  |    | ■  | ■  |
| Mobile, drive-through, pop-up vaccination clinics                                  | ■                |    | ■  | ■  |    | ■  |                   | ■  | ■  |    | ■  | ■  | ■                                     | ■  | ■  | ■  | ■  | ■  |                       | ■  | ■  | ■  |    | ■  | ■                             | ■  | ■  | ■  | ■  | ■  |
| Workplace-based or in-home vaccination clinics                                     |                  |    |    |    | ■  |    | ■                 |    |    | ■  | ■  | ■  |                                       |    |    |    | ■  |    |                       | ■  |    |    | ■  |    | ■                             | ■  | ■  | ■  | ■  | ■  |
| Transportation to vaccination clinics                                              |                  |    | ■  | ■  |    |    |                   |    | ■  | ■  |    |    |                                       |    | ■  |    |    |    |                       |    | ■  | ■  |    |    | ■                             | ■  | ■  | ■  | ■  | ■  |
| Use of public and private health workforce                                         | ■                | ■  | ■  | ■  | ■  | ■  | ■                 | ■  | ■  |    | ■  | ■  |                                       | ■  | ■  |    |    |    | ■                     | ■  | ■  |    | ■  | ■  | ■                             | ■  | ■  | ■  |    | ■  |
| Targeted distribution of vaccines to communities with known low vaccine confidence |                  | ■  |    | ■  | ■  |    |                   | ■  |    |    | ■  |    |                                       | ■  |    |    | ■  |    |                       | ■  | ■  | ■  | ■  | ■  | ■                             | ■  |    |    | ■  |    |
| Language-appropriate resources and communication strategies                        | ■                | ■  |    | ■  | ■  | ■  | ■                 | ■  | ■  | ■  | ■  | ■  | ■                                     |    |    |    | ■  |    | ■                     | ■  |    | ■  | ■  | ■  |                               |    |    |    | ■  | ■  |
| Culturally competent and community-specific vaccination clinics                    |                  | ■  | ■  | ■  |    | ■  |                   | ■  |    | ■  |    |    |                                       |    |    | ■  | ■  | ■  | ■                     | ■  |    | ■  | ■  | ■  |                               |    |    |    |    |    |
| Community engagement and use of local leadership                                   | ■                | ■  | ■  | ■  | ■  | ■  | ■                 | ■  | ■  | ■  | ■  | ■  | ■                                     | ■  | ■  | ■  | ■  | ■  | ■                     | ■  | ■  | ■  | ■  | ■  | ■                             | ■  | ■  | ■  | ■  | ■  |
| Community-specific financial and non-financial incentives                          |                  |    | ■  |    |    |    | ■                 |    | ■  | ■  | ■  | ■  |                                       |    | ■  |    | ■  |    |                       | ■  | ■  |    |    |    |                               |    | ■  |    |    |    |

5 **Figure 3. Facilitators and barriers to the implementation of provincial strategies used to**  
6 **deliver COVID-19 first and second doses to priority populations**

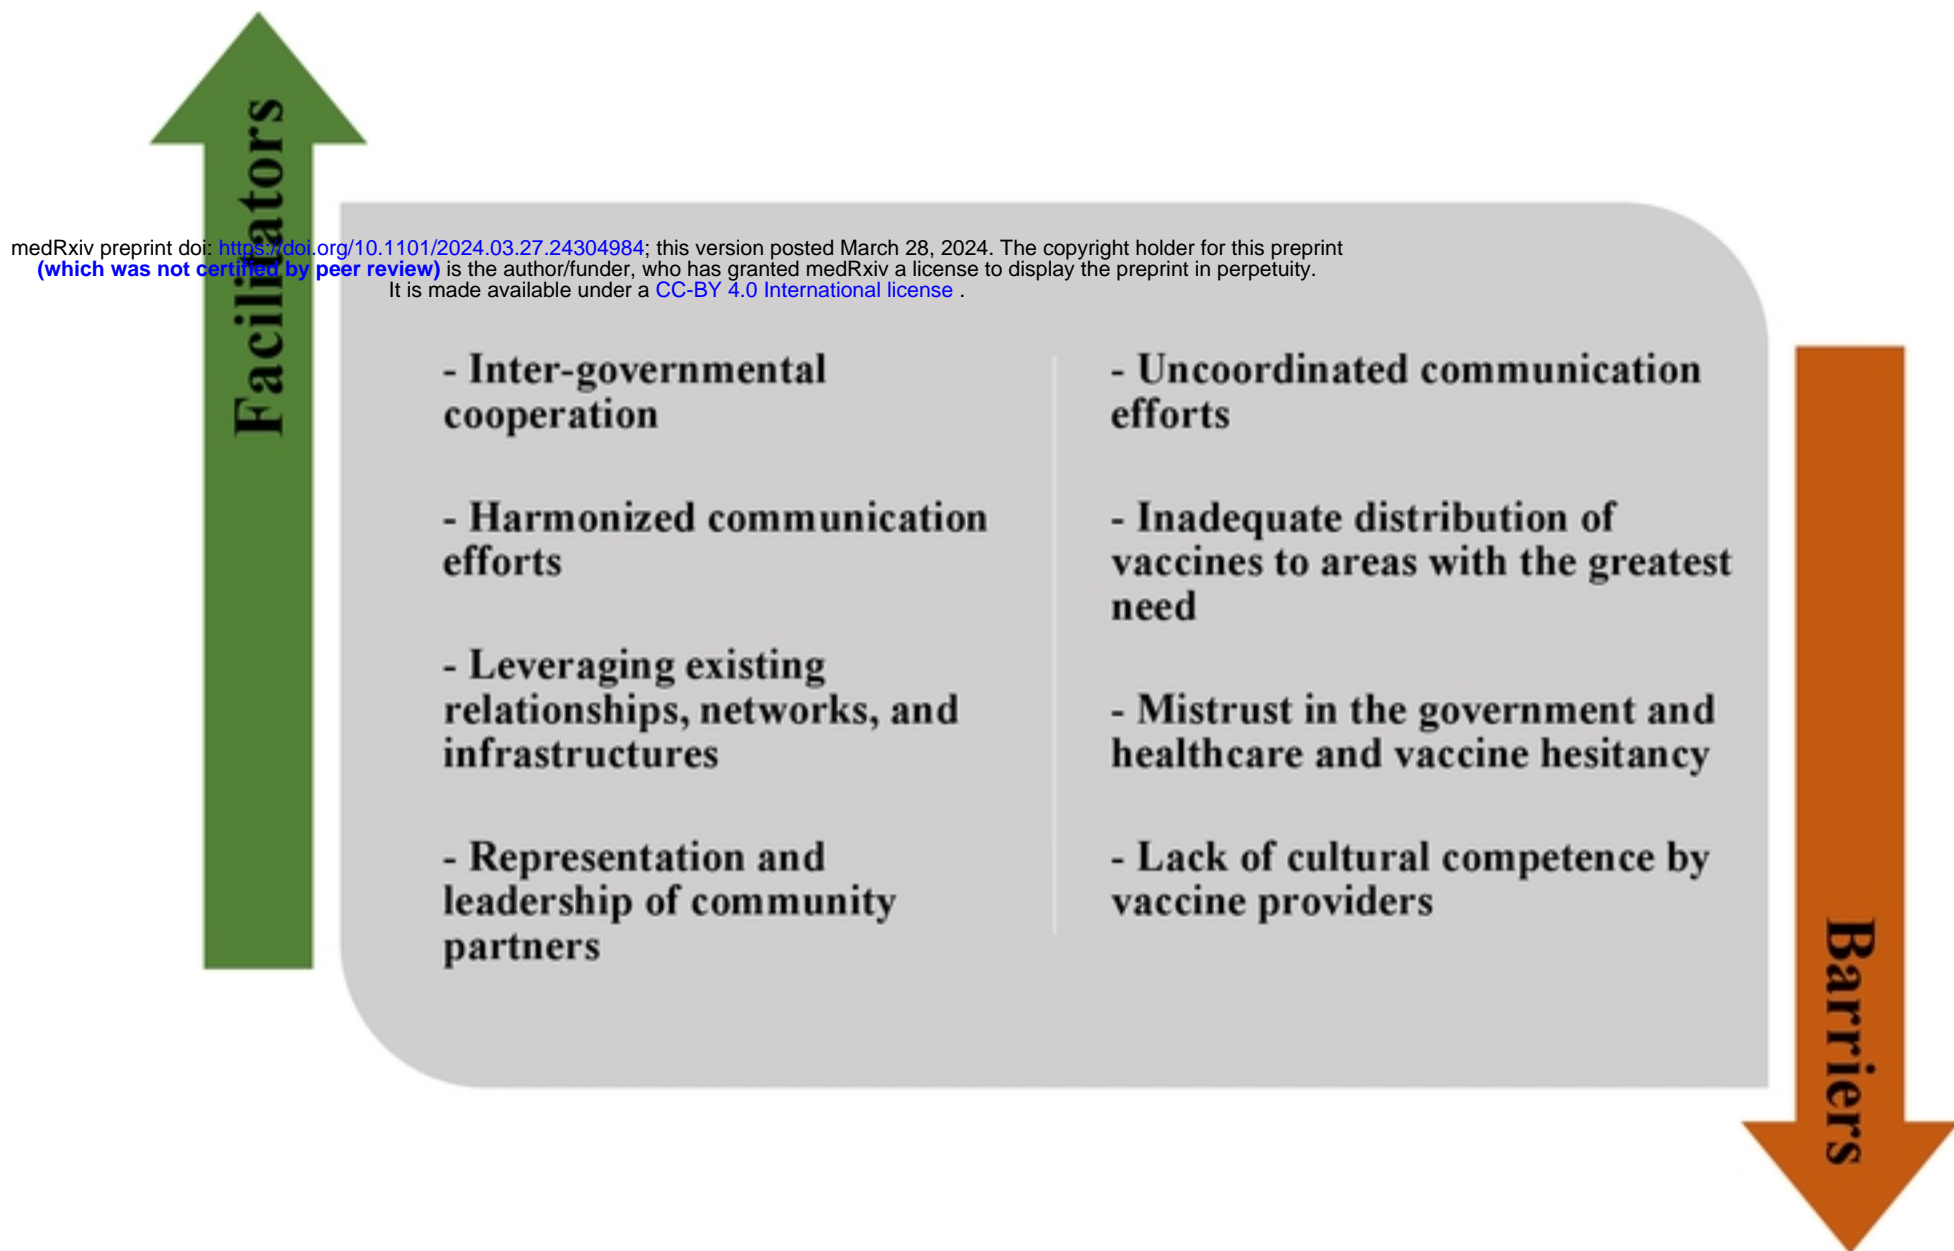

Source: http://medrxiv.org/content/10.1101/2024.03.27.24304984v1.full.pdf
